# Supplementary material for: Patient Safety Culture in Latin American Hospitals: A Systematic Review with Meta-Analysis
Source: MDPI journal article supplement (doi:10.3390/ijerph192114380), 2022-11-03
Supplement: s1 [file s1]

## Supplemental File S2. Search Strategy Examples

| Database                    | Search strategy                                                                                                                                                                                                                                                                                                                                                                                                                                                                                                                                                                                                                                                                                                                                                                                                                                                                                                                                                                                                                                                                                                                                                                                                                                                                                                                                                                                                              |
|-----------------------------|------------------------------------------------------------------------------------------------------------------------------------------------------------------------------------------------------------------------------------------------------------------------------------------------------------------------------------------------------------------------------------------------------------------------------------------------------------------------------------------------------------------------------------------------------------------------------------------------------------------------------------------------------------------------------------------------------------------------------------------------------------------------------------------------------------------------------------------------------------------------------------------------------------------------------------------------------------------------------------------------------------------------------------------------------------------------------------------------------------------------------------------------------------------------------------------------------------------------------------------------------------------------------------------------------------------------------------------------------------------------------------------------------------------------------|
| PUBMED                      | <ol style="list-style-type: none"> <li>1. Patient safety (MeSH terms)</li> <li>2. Safety, Patient (All terms)</li> <li>3. 1 OR 2 OR</li> <li>4. Culture (MeSH terms)</li> <li>5. Cultures (All terms)</li> <li>6. 4 OR 5 OR</li> <li>7. Health Care Surveys</li> <li>8. Care Survey, Health</li> <li>9. Care Surveys, Health</li> <li>10. Health Care Survey</li> <li>11. Healthcare Surveys</li> <li>12. Healthcare Survey</li> <li>13. 7 OR 8 OR 9 OR 10 OR 11 OR 12 OR</li> <li>14. Hospitals</li> <li>15. Latin America</li> <li>16. 14 OR 15</li> </ol>                                                                                                                                                                                                                                                                                                                                                                                                                                                                                                                                                                                                                                                                                                                                                                                                                                                                 |
| Biblioteca Virtual de Salud | <p>(patient safety) AND (culture) AND ( fulltext:("1" OR "1" OR "1" OR "1" OR "1" OR "1") AND db:("MEDLINE" OR "LILACS" OR "BDENF") AND type_of_study:("prevalence_studies" OR "incidence_studies") AND la:("en" OR "pt" OR "es") AND pais_assunto:("america do sul" OR "brasil" OR "mexico" OR "colombia" OR "america central" OR "peru" OR "bolivia" OR "costa rica" OR "ecuador" OR "venezuela") AND type:("article")) AND (year_cluster:[2011 TO 2021])</p> <p>(patient safety) AND (health care surveys) AND ( fulltext:("1" OR "1") AND mj:("Seguridad del Paciente" OR "Actitud del Personal de Salud") AND type_of_study:("prevalence_studies" OR "incidence_studies" OR "evaluation_studies") AND la:("en" OR "pt" OR "es") AND pais_assunto:("america do sul" OR "brasil" OR "mexico" OR "colombia" OR "argentina" OR "ecuador" OR "peru" OR "venezuela") AND type:("article")) AND (year_cluster:[2011 TO 2021])</p> <p>(patient safety) AND (latin america) AND ( fulltext:("1" OR "1") AND mj:("Seguridad del Paciente" OR "Gestión de Riesgos" OR "América Latina") AND type_of_study:("prevalence_studies" OR "incidence_studies" OR "evaluation_studies") AND la:("en" OR "es" OR "pt") AND pais_assunto:("america central" OR "america do sul" OR "chile" OR "colombia" OR "el salvador" OR "guatemala" OR "mexico" OR "brasil" OR "argentina") AND type:("article")) AND (year_cluster:[2011 TO 2021])</p> |
| Scopus                      | <p>patient safety and culture and Latin America</p> <p>Filters: Subscribed journals, Research articles, subject areas (Medicine and Dentistry, Business, Nursing and Health Professions), Open access &amp; Open archive</p> <p>patient safety AND hospitals AND Health care surveys</p> <p>Filters: Subscribed journals, Research articles, subject areas (Medicine and Dentistry, Business, Nursing and Health Professions), Open access &amp; Open archive</p>                                                                                                                                                                                                                                                                                                                                                                                                                                                                                                                                                                                                                                                                                                                                                                                                                                                                                                                                                            |
