# Supplementary material for: Patient Safety Culture in Latin American Hospitals: A Systematic Review with Meta-Analysis
Source: MDPI journal article supplement (doi:10.3390/ijerph192114380), 2022-11-03
Supplement: s1 [file s1]

## Supplemental File S4. Positive Responses for Safety Culture by Dimension

### Section A. Positive Nurse Responses for Patient Safety Culture by Dimension

| First Author (Year)            | D1          | D2          | D3          | D4          | D5          | D6          | D7          | D8          | D9          | D10         | D11         | D12         | Mean        | SD         |
|--------------------------------|-------------|-------------|-------------|-------------|-------------|-------------|-------------|-------------|-------------|-------------|-------------|-------------|-------------|------------|
| Abreu (2019)                   | 42.2        | 37.8        | 58.7        | 37.3        | 47.1        | 32.6        | 32.3        | 41.3        | 34.1        | 40.6        | 39.1        | 37.0        | 40.0        | 7.2        |
| Castañeda-Hidalgo (2013)       | 82.1        | 63.1        | 83.6        | 43.6        | 44.1        | 58          | 47.2        | 67.2        | 62.6        | 21.0        | 45.1        | 36.9        | 54.5        | 18.4       |
| Costa (2018)                   | 57.1        | 37.4        | 60.5        | 47.1        | 45.3        | 51.8        | 36.6        | 61.4        | 44.2        | 36.8        | 53.1        | 58.0        | 49.1        | 9.2        |
| da Silva (2020)                | 68.8        | 42.7        | 69.6        | 53.6        | 51.1        | 52.2        | 42.7        | 40.1        | 45.0        | 52.2        | 33.0        | 65.8        | 51.4        | 11.7       |
| da Silva (2021)                | 43.1        | 50.0        | 56.9        | 23.6        | 27.2        | 31.5        | 40.0        | 43.0        | 31.8        | 25.9        | 37.2        | 9.1         | 34.9        | 12.9       |
| Fagundes (2021)                | 59.4        | 63.3        | 62.7        | 29.4        | 44.2        | 38.9        | 42.9        | 45.0        | 26.0        | 35.5        | 28.9        | 21.6        | 41.5        | 14.3       |
| Fassarella (2018)              | 68.0        | 69.0        | 57.0        | 15.0        | 36.0        | 39.0        | 59.0        | 29.0        | 23.0        | 34.0        | 36.0        | 23.0        | 40.7        | 18.2       |
| Netto (2016)                   | 73.0        | 79.0        | 71.0        | 61.0        | 54.0        | 52.0        | 53.0        | 51.0        | 36.0        | 45.0        | 18.0        | 44.0        | 53.1        | 16.9       |
| Lopez Campelo (2021)           | 57.7        | 58.9        | 59.5        | 53.4        | 42.9        | 27.6        | 12.3        | 56.4        | 49.7        | 44.8        | 41.1        | 55.2        | 46.6        | 14.3       |
| Ribeiro (2019)                 | 50.2        | 54.1        | 59.4        | 43.4        | 47.8        | 37.9        | 47.8        | 56.9        | 36.5        | 32.0        | 46.2        | 24.1        | 44.7        | 10.5       |
| Sanchis (2020)                 | 72.6        | 66.5        | 66.3        | 48.5        | 46.5        | 58.8        | 28.5        | 59.1        | 41.2        | 37.0        | 43.6        | 21.9        | 49.2        | 15.8       |
| Santiago (2015)                | 62.1        | 75.4        | 74.3        | 67.8        | 52.6        | 54.1        | 50.4        | 65.1        | 50.9        | 56.2        | 52.9        | 29.6        | 57.6        | 12.5       |
| Viana (2020)                   | 68.1        | 20.7        | 84.8        | 21.3        | 15.7        | 67.6        | 50.8        | 43.6        | 30.9        | 21.8        | 5.6         | 62.5        | 41.1        | 25.4       |
| <b>Mean Positive Response</b>  | <b>61.9</b> | <b>55.2</b> | <b>66.5</b> | <b>41.9</b> | <b>42.7</b> | <b>46.3</b> | <b>41.8</b> | <b>50.7</b> | <b>39.4</b> | <b>37.1</b> | <b>36.9</b> | <b>37.6</b> | <b>42.9</b> | <b>--</b>  |
| <b>Standard Deviation (SD)</b> | <b>11.9</b> | <b>16.9</b> | <b>9.6</b>  | <b>15.9</b> | <b>10.7</b> | <b>12.4</b> | <b>12.3</b> | <b>11.4</b> | <b>11.0</b> | <b>10.7</b> | <b>13.4</b> | <b>18.2</b> | <b>--</b>   | <b>6.7</b> |

### Section B. Positive Physician Responses for Patient Safety Culture by Dimension

| First Author et al. (Year)     | D1          | D2          | D3          | D4          | D5          | D6          | D7          | D8          | D9          | D10         | D11         | D12         | Mean        | SD         |
|--------------------------------|-------------|-------------|-------------|-------------|-------------|-------------|-------------|-------------|-------------|-------------|-------------|-------------|-------------|------------|
| Hamui-Sutton (2015)            | 78.1        | 66.6        | 76.5        | 61.0        | 62.3        | 60.4        | 44.7        | 54.7        | 62.2        | 38.3        | 53.5        | 36.2        | 57.9        | 13.3       |
| Pérez-Castro (2014)            | 70.6        | 54.3        | 65.9        | 64.6        | 52.0        | 68.2        | 51.2        | 66.9        | 55.8        | 67.9        | 54.1        | 69.7        | 61.8        | 7.6        |
| <b>Mean Positive Response</b>  | <b>74.4</b> | <b>60.5</b> | <b>71.2</b> | <b>62.8</b> | <b>57.2</b> | <b>64.3</b> | <b>48.0</b> | <b>60.8</b> | <b>59.0</b> | <b>53.1</b> | <b>53.8</b> | <b>53.0</b> | <b>59.8</b> | <b>--</b>  |
| <b>Standard Deviation (SD)</b> | <b>5.3</b>  | <b>8.7</b>  | <b>7.5</b>  | <b>2.5</b>  | <b>7.3</b>  | <b>5.5</b>  | <b>4.6</b>  | <b>8.6</b>  | <b>4.5</b>  | <b>20.9</b> | <b>0.4</b>  | <b>23.7</b> | <b>--</b>   | <b>2.8</b> |

### Section C. Positive Other Professionals Responses for Patient Safety Culture by Dimension

| First Author (Year)            | D1          | D2          | D3          | D4          | D5          | D6          | D7          | D8          | D9          | D10         | D11         | D12         | Mean        | SD          |
|--------------------------------|-------------|-------------|-------------|-------------|-------------|-------------|-------------|-------------|-------------|-------------|-------------|-------------|-------------|-------------|
| Almeida do Carmo (2020)        | 57.0        | 57.0        | 55.0        | 41.0        | 35.0        | 37.0        | 39.0        | 31.0        | 35.0        | 40.0        | 43.0        | 19.0        | 40.8        | 11.2        |
| Andrade (2018)                 | 60.8        | 66.7        | 60.0        | 52.1        | 31.7        | 42.1        | 56.2        | 39.2        | 47.8        | 45.2        | 37.7        | 36.1        | 48.0        | 11.2        |
| Arrieta (2017)                 | 66.0        | 49.0        | 61.0        | 39.0        | 44.0        | 37.0        | 35.0        | 30.0        | 43.0        | 27.0        | 41.0        | 30.0        | 41.8        | 12.0        |
| Antunes Marques (2019)         | 59.4        | 49.9        | 49.3        | 26.4        | 32.2        | 33.9        | 45.3        | 39.9        | 37.3        | 36.2        | 45.7        | 18.9        | 39.5        | 11.2        |
| Batista (2021)                 | 56.0        | 56.4        | 59.5        | 30.8        | 45.8        | 37.8        | 50.8        | 45.3        | 30.7        | 39.2        | 32.5        | 19.3        | 42.0        | 12.4        |
| Bravo (2020)                   | 90.3        | 71.5        | 75.9        | 75.0        | 65.3        | 65.7        | 34.3        | 62.0        | 73.7        | 66.0        | 74.3        | 40.7        | 66.2        | 15.3        |
| de Lima Garcia (2019)          | 60.8        | 46.6        | 21.6        | 22.3        | 11.5        | 9.5         | 6.8         | 30.4        | 46.6        | 26.5        | 52.7        | 0.7         | 28.0        | 19.7        |
| Galvão (2018)                  | 58.0        | 56.0        | 58.0        | 35.0        | 33.0        | 38          | 41.0        | 44.0        | 37.0        | 33.0        | 36.0        | 18.0        | 40.6        | 11.9        |
| Jaimes-Valencia (2021)         | 85.5        | 74.2        | 81.5        | 69.1        | 57.4        | 66.2        | 38.7        | 69.1        | 66.1        | 55.7        | 57.2        | 49.6        | 64.2        | 13.3        |
| Massaroli (2021)               | 59.0        | 58.0        | 66.0        | 40.0        | 41.0        | 60          | 48.0        | 53.0        | 36.0        | 34.0        | 44.0        | 16.0        | 46.3        | 14.0        |
| Okuyama (2019)                 | 51.0        | 53.0        | 51.5        | 23.0        | 34.7        | 35.7        | 40.0        | 43.8        | 24.8        | 28.0        | 26.8        | 15.6        | 35.7        | 12.4        |
| Pedroni (2020)                 | 78.9        | 85.5        | 89.4        | 83.7        | 63.0        | 70.7        | 72.5        | 60.0        | 52.2        | 43.6        | 52.1        | 46.3        | 66.5        | 15.9        |
| Ramos (2017)                   | 79.4        | 65.9        | 75.0        | 52.9        | 48.6        | 64.4        | 50.1        | 59.8        | 38.0        | 32.6        | 41.3        | 37.9        | 53.8        | 15.2        |
| Salazar (2020)                 | 82.9        | 70.0        | 82.9        | 70.8        | 56.9        | 59.7        | 45.4        | 70.2        | 56.2        | 50.8        | 57.3        | 46.3        | 62.5        | 12.9        |
| Tomazoni (2015)                | 57.0        | 61.0        | 59.0        | 22.0        | 36.0        | 35.0        | 55.0        | 47.0        | 28.0        | 42.0        | 51.0        | 18.0        | 42.6        | 14.8        |
| <b>Mean Positive Response</b>  | <b>66.8</b> | <b>61.4</b> | <b>63.0</b> | <b>45.5</b> | <b>42.4</b> | <b>46.2</b> | <b>43.9</b> | <b>48.3</b> | <b>43.5</b> | <b>40.0</b> | <b>46.2</b> | <b>27.5</b> | <b>47.9</b> | <b>--</b>   |
| <b>Standard Deviation (SD)</b> | <b>12.8</b> | <b>10.8</b> | <b>16.7</b> | <b>20.7</b> | <b>14.3</b> | <b>17.2</b> | <b>14.2</b> | <b>13.5</b> | <b>13.8</b> | <b>11.1</b> | <b>11.8</b> | <b>14.5</b> | <b>--</b>   | <b>12.0</b> |
