# Supplementary material for: Patient Safety Culture in Latin American Hospitals: A Systematic Review with Meta-Analysis
Source: MDPI journal article supplement (doi:10.3390/ijerph192114380), 2022-11-03
Supplement: s1 [file s1]

### Supplemental File S3. Characteristics of Reviewed Studies (N=30)

| #  | First Author (Year)      | Services                                               | Hospitals | Data Collection | Nurses | Physicians | Others | Total Participants | Observations                            |
|----|--------------------------|--------------------------------------------------------|-----------|-----------------|--------|------------|--------|--------------------|-----------------------------------------|
| 1  | Abreu (2019)             | Surgical center                                        | 1         | Paper           | 92     |            |        | 418                |                                         |
| 2  | Almeida do Carmo (2020)  | Maternal and child hospital                            | 3         | Paper           | 162    | 114        | 25     | 301                |                                         |
| 3  | Arrieta (2018)           | Various units                                          | 4         | Online          | 286    | 1158       | 235    | 1679               |                                         |
| 4  | Batista (2021)           | Surgical services                                      | 1         | Paper           | 86     | 72         |        | 158                |                                         |
| 5  | Bravo (2020)             | Various units                                          | 1         | Paper           | 11     | 19         | 13     | 43                 |                                         |
| 6  | Castañeda-Hidalgo (2013) | Various units                                          | 1         | Paper           | 195    |            |        | 195                |                                         |
| 7  | Costa (2018)             | Various units                                          | 2         | Paper           | 437    |            |        | 437                |                                         |
| 8  | da Silva (2020)          | Maternal hospital                                      | 1         | Paper           | 69     |            |        | 69                 |                                         |
| 9  | da Silva (2021)          | Obstetrics units                                       | 1         | Paper           | 62     |            |        | 62                 | Also used MISSCARE-Brazil questionnaire |
| 10 | de Lima Garcia (2019)    | Pediatric units                                        | 1         | Paper           | 117    | 20         | 9      | 146                | Also used the Maslach Burnout Inventory |
| 11 | Fagundes (2021)          | Surgical center                                        | 2         | Paper           | 90     |            |        | 90                 |                                         |
| 12 | Fassarella (2018)        | Obstetrics, pediatrics, surgical, intensive care units | 2         | Paper           | 195    |            |        | 195                | The results from Brazil were abstracted |
| 13 | Galvão (2018)            | Various units                                          | 1         | Online          | 190    | 40         | 151    | 381                |                                         |
| 14 | Hamui-Sutton (2015)      | Various units                                          | Various   | Online          |        | 2500       |        | 2500               | National survey of physician residents  |
| 15 | Jaimes-Valencia (2021)   | Various units                                          | 2         | Online          | 184    | 23         | 195    | 402                | The last measurement was taken          |

| #  | First Author (Year)    | Services                                               | Hospitals | Data Collection | Nurses | Physicians | Others | Total Participants | Observations                             |
|----|------------------------|--------------------------------------------------------|-----------|-----------------|--------|------------|--------|--------------------|------------------------------------------|
| 16 | Lima Andrade (2018)    | Various units                                          | 3         | Paper           | 102    | 23         | 20     | 145                |                                          |
| 17 | Lopes Campelo (2021)   | Surgical, cardiology, and general intensive care units | 1         | Paper           | 163    |            |        | 163                |                                          |
| 18 | Massaroli (2021)       | Various units                                          | 1         | Paper           | 245    |            | 46     | 291                |                                          |
| 19 | Netto (2016)           | Various units                                          | 1         | Paper           | 247    |            |        | 247                |                                          |
| 20 | Antunes Marques (2019) | Intensive care units                                   | 3         | Paper           | 344    | 79         | 91     | 514                |                                          |
| 21 | Okuyama (2018)         | Various units                                          | 1         | Paper           | 142    | 53         | 119    | 314                |                                          |
| 22 | Pedroni (2020)         | Obstetrics and pediatric units                         | 1         | Paper           | 30     | 43         |        | 73                 |                                          |
| 23 | Perez-Castro (2015)    | Various units                                          | Various   | Online          |        | 327        |        | 327                | National Autonomous University of Mexico |
| 24 | Ramos (2017)           | Various units                                          | 1         | Paper           | 144    | 24         | 23     | 191                |                                          |
| 25 | Ribeiro (2019)         | Units specialized in cardiopulmonary care              | 1         | Paper           | 102    |            |        | 102                |                                          |
| 26 | Salazar (2020)         | Surgical services                                      | 6         | Paper           | 265    | 175        | 74     | 514                |                                          |
| 27 | Sanchis (2020)         | Various units                                          | 3         | Paper           | 587    |            |        | 587                |                                          |
| 28 | Santiago (2015)        | Intensive care unit                                    | 1         | Paper           |        |            |        | 88                 | Also used the SAQ questionnaire          |
| 29 | Tomazoni (2014)        | Neonatal intensive care unit                           | 4         | Paper           | 93     | 48         |        | 141                |                                          |
| 30 | Viana (2020)           | Various units                                          | 4         | Paper           | 376    |            |        | 376                |                                          |
