# Supplementary material for: Patient Safety Culture in Latin American Hospitals: A Systematic Review with Meta-Analysis
Source: MDPI journal article supplement (doi:10.3390/ijerph192114380), 2022-11-03
Supplement: s1 [file s1]

### Supplemental File S1. Item Comparison Across English and Spanish Versions of the HSOPSC 1.0

| Item | Dim | AHRQ: HSOPSC <sup>1</sup><br>English Version (USA)                                            | AHRQ: HSOPSC <sup>2</sup><br>Spanish Version (USA)                                                    | CUSEP: HSOPSC <sup>3</sup><br>Spanish Version (Spain)                                                                             | Palmieri: HSOPSC <sup>4</sup><br>Spanish Version (Peru)                                                     |
|------|-----|-----------------------------------------------------------------------------------------------|-------------------------------------------------------------------------------------------------------|-----------------------------------------------------------------------------------------------------------------------------------|-------------------------------------------------------------------------------------------------------------|
| A-1  | 1   | People support one another in this unit.                                                      | La gente se apoya una a la otra en esta unidad.                                                       | El personal se apoya mutuamente.                                                                                                  | La gente se apoya el uno al otro en este servicio/ unidad.                                                  |
| A-2  | 10  | We have enough staff to handle the workload.                                                  | Tenemos suficiente personal para hacer todo el trabajo.                                               | Hay suficiente personal para afrontar la carga de trabajo.                                                                        | Tenemos suficiente personal para afrontar la carga de trabajo.                                              |
| A-3  | 1   | When a lot of work needs to be done quickly, we work together as a team to get the work done. | Cuando se tiene que hacer mucho trabajo rápidamente, trabajamos en equipo de trabajo para terminarlo. | Cuando tenemos mucho trabajo, colaboramos todos como un equipo para poder terminarlo.                                             | Cuando se necesita hacer mucho trabajo rápidamente, colaboramos todos como un equipo para poder terminarlo. |
| A-4  | 1   | In this unit, people treat each other with respect.                                           | En esta unidad, el personal se trata con respeto.                                                     | En esta unidad nos tratamos todos con respeto.                                                                                    | En este servicio/unidad, el personal se trata con respeto.                                                  |
| A-5  | 10  | Staff in this unit work longer hours than is best for patient care.                           | El personal en esta unidad trabaja más horas de lo que es mejor para el cuidado del paciente.         | A veces, no se puede proporcionar la mejor atención al paciente porque la jornada laboral es agotadora.                           | El personal en este servicio/unidad trabaja más horas de lo que es mejor para el cuidado del paciente.      |
| A-6  | 3   | We are actively doing things to improve patient safety.                                       | Estamos haciendo cosas de manera activa para mejorar la seguridad del paciente.                       | Tenemos actividades dirigidas a mejorar la seguridad del paciente.                                                                | Hacemos actividades para mejorar la seguridad del paciente.                                                 |
| A-7  | 10  | We use more agency/temporary staff than is best for patient care.                             | Usamos más personal de agencia/temporal de lo que es lo mejor para el cuidado del paciente.           | En ocasiones no se presta la mejor atención al paciente porque hay demasiados sustitutos o personal temporal.                     | Usamos más personal de reemplazo o temporal de lo que es mejor para el cuidado del paciente.                |
| A-8  | 12  | Staff feel like their mistakes are held against them.                                         | El personal siente que sus errores son considerados en su contra.                                     | Si los compañeros o los superiores se enteran de que has cometido algún error, lo utilizan en tu contra.                          | El personal siente que sus errores son considerados en su contra.                                           |
| A-9  | 3   | Mistakes have led to positive changes here.                                                   | Los errores han llevado a cambios positivos aquí.                                                     | Cuando se detecta algún fallo en la atención al paciente se llevan a cabo las medidas apropiadas para evitar que ocurra de nuevo. | Los errores han llevado a realizar cambios positivos aquí.                                                  |
| A-10 | 5   | It is just by chance that more serious mistakes don't happen around here.                     | Es sólo por casualidad que errores más serios no ocurren aquí.                                        | No se producen más fallos por casualidad.                                                                                         | Es sólo por casualidad que errores más serios no suceden aquí.                                              |

|             |           |                                                                                                                        |                                                                                                                                                                         |                                                                                                                               |                                                                                                                                          |
|-------------|-----------|------------------------------------------------------------------------------------------------------------------------|-------------------------------------------------------------------------------------------------------------------------------------------------------------------------|-------------------------------------------------------------------------------------------------------------------------------|------------------------------------------------------------------------------------------------------------------------------------------|
| <b>A-11</b> | <b>1</b>  | When one area in this unit gets really busy, others help out.                                                          | Cuando un área en esta unidad está realmente ocupada, otras le ayudan.                                                                                                  | Cuando alguien está sobrecargado de trabajo, suele encontrar ayuda en los compañeros.                                         | Cuando el personal en este servicio/unidad está realmente ocupado, otros le ayudan.                                                      |
| <b>A-12</b> | <b>12</b> | When an event is reported, it feels like the person is being written up, not the problem.                              | Cuando se informa de un incidente, se siente que la persona está siendo reportada y no el problema.                                                                     | Cuando se detecta algún fallo, antes de buscar la causa, buscan un “culpable”.                                                | Cuando se reporta un evento, se tiene la sensación de que se reporta a la persona y no al evento.                                        |
| <b>A-13</b> | <b>3</b>  | After we make changes to improve patient safety, we evaluate their effectiveness.                                      | Después de hacer los cambios para mejorar la seguridad de los pacientes, evaluamos su efectividad.                                                                      | Los cambios que hacemos para mejorar la seguridad del paciente se evalúan para comprobar su efectividad.                      | Después de hacer los cambios para mejorar la seguridad de los pacientes, evaluamos si los resultados son los esperados.                  |
| <b>A-14</b> | <b>10</b> | We work in "crisis mode" trying to do too much, too quickly.                                                           | Frecuentemente, trabajamos en "tipo crisis" intentando hacer mucho, muy rápidamente.                                                                                    | Trabajamos bajo presión para realizar demasiadas cosas demasiado deprisa.                                                     | 14. Trabajamos a alta presión intentando realizar demasiadas cosas muy rápidamente.                                                      |
| <b>A-15</b> | <b>5</b>  | Patient safety is never sacrificed to get more work done.                                                              | La seguridad del paciente nunca se sacrifica por hacer más trabajo.                                                                                                     | Nunca se aumenta el ritmo de trabajo si eso implica sacrificar la seguridad del paciente.                                     | La seguridad del paciente nunca se sacrifica por hacer más trabajo.                                                                      |
| <b>A-16</b> | <b>12</b> | Staff worry that mistakes they make are kept in their personnel file.                                                  | El personal se preocupa de que los errores que cometen sean guardados en sus expedientes.                                                                               | Cuando se comete un error, el personal teme que eso quede en su expediente.                                                   | 16. Cuando se comete un error, el personal teme que eso quede en su expediente.                                                          |
| <b>A-17</b> | <b>5</b>  | We have patient safety problems in this unit.                                                                          | Tenemos problemas con la seguridad de los pacientes en esta unidad.                                                                                                     | En esta unidad hay problemas relacionados con la “seguridad del paciente”.                                                    | Tenemos problemas con la seguridad de los pacientes en este servicio/unidad.                                                             |
| <b>A-18</b> | <b>5</b>  | Our procedures and systems are good at preventing errors from happening.                                               | Nuestros procedimientos y sistemas son efectivos para la prevención de errores que puedan ocurrir.                                                                      | Nuestros procedimientos y medios de trabajo son buenos para evitar errores en la asistencia.                                  | Nuestros procedimientos y procesos son efectivos para la prevención de errores que puedan ocurrir.                                       |
| <b>B-1</b>  | <b>2</b>  | My supervisor/manager says a good word when he/she sees a job done according to established patient safety procedures. | Mi supervisor/director hace comentarios favorables cuando él/ella ve un trabajo hecho de conformidad con los procedimientos establecidos de seguridad de los pacientes. | Mi superior/jefe expresa su satisfacción cuando intentamos evitar riesgos en la seguridad del paciente.                       | Mi jefe hace comentarios favorables cuando ve un trabajo hecho de acuerdo con los procedimientos establecidos de seguridad del paciente. |
| <b>B-2</b>  | <b>2</b>  | My supervisor/manager seriously considers staff suggestions for improving patient safety.                              | Mi supervisor/director considera seriamente las sugerencias del personal para mejorar la seguridad de los pacientes.                                                    | Mi superior/jefe tiene en cuenta, seriamente, las sugerencias que le hace el personal para mejorar la seguridad del paciente. | Mi jefe considera seriamente las sugerencias del personal para mejorar la seguridad de los pacientes.                                    |

|            |          |                                                                                                                 |                                                                                                                                                      |                                                                                                                                                        |                                                                                                                                          |
|------------|----------|-----------------------------------------------------------------------------------------------------------------|------------------------------------------------------------------------------------------------------------------------------------------------------|--------------------------------------------------------------------------------------------------------------------------------------------------------|------------------------------------------------------------------------------------------------------------------------------------------|
| <b>B-3</b> | <b>2</b> | Whenever pressure builds up, my supervisor/ manager wants us to work faster, even if it means taking shortcuts. | Cuando la presión se incrementa, mi supervisor/director quiere que trabajemos más rápido, aún si esto significa simplificar las labores del trabajo. | Cuando aumenta la presión del trabajo, mi superior/jefe pretende que trabajemos más rápido, aunque se pueda poner en riesgo la seguridad del paciente. | Cuando la presión se incrementa, mi jefe quiere que trabajemos más rápido, aún si esto significa acortar en forma negativa los procesos. |
| <b>B-4</b> | <b>2</b> | My supervisor/manager overlooks patient safety problems that happen over and over.                              | Mi supervisor/director no hace caso de los problemas de seguridad en los pacientes que ocurren una y otra vez.                                       | Mi superior/jefe pasa por alto los problemas de seguridad del paciente que ocurren habitualmente.                                                      | Mi jefe no hace caso de los problemas de seguridad en los pacientes que ocurren una y otra vez.                                          |
| <b>C-1</b> | <b>6</b> | We are given feedback about changes put into place based on event reports.                                      | La Dirección nos informa sobre los cambios realizados que se basan en informes de incidentes.                                                        | Cuando notificamos algún incidente, nos informan sobre qué tipo de actuaciones se han llevado a cabo.                                                  | Se nos informa sobre los cambios hechos en base a reportes de eventos.                                                                   |
| <b>C-2</b> | <b>7</b> | Staff will freely speak up if they see something that may negatively affect patient care.                       | El personal habla libremente si ve algo que podría afectar negativamente el cuidado del paciente.                                                    | Cuando el personal ve algo que puede afectar negativamente a la atención que recibe el paciente, habla de ello con total libertad.                     | El personal habla libremente si ve algo que podría afectar negativamente el cuidado del paciente.                                        |
| <b>C-3</b> | <b>6</b> | We are informed about errors that happen in this unit.                                                          | Se nos informa sobre los errores que se cometen en esta unidad.                                                                                      | Se nos informa de los errores que ocurren en este servicio/unidad.                                                                                     | Se nos informa sobre los errores que se cometen en este servicio/unidad.                                                                 |
| <b>C-4</b> | <b>7</b> | Staff feel free to question the decisions or actions of those with more authority.                              | El personal se siente libre de cuestionar las decisiones o acciones de aquellos con mayor autoridad.                                                 | El personal puede cuestionar con total libertad las decisiones o acciones de sus superiores.                                                           | El personal se siente libre de cuestionar las decisiones o acciones de aquellos con mayor autoridad.                                     |
| <b>C-5</b> | <b>6</b> | In this unit, we discuss ways to prevent errors from happening again.                                           | En esta unidad, hablamos sobre formas de prevenir los errores para que no se vuelvan a cometer.                                                      | En mi servicio/unidad discutimos de qué manera se puede evitar que un error vuelva a ocurrir.                                                          | En este servicio/unidad debatimos maneras de prevenir errores para que no ocurran nuevamente.                                            |
| <b>C-6</b> | <b>7</b> | Staff are afraid to ask questions when something does not seem right.                                           | El personal tiene miedo de hacer preguntas cuando algo no parece estar bien.                                                                         | El personal teme hacer preguntas sobre lo que parece que se ha hecho de forma incorrecta.                                                              | El personal tiene miedo de hacer preguntas cuando algo no parece estar bien.                                                             |
| <b>D-1</b> | <b>8</b> | When a mistake is made, but is caught and corrected before affecting the patient, how often is this reported?   | Cuando se comete un error, pero es descubierto y corregido antes de afectar al paciente, ¿qué tan a menudo es reportado?                             | Se notifican los errores que son descubiertos y corregidos antes de afectar al paciente.                                                               | Cuando se comete un error, pero es descubierto y corregido antes de afectar al paciente, ¿con qué frecuencia es reportado?               |

|            |           |                                                                                               |                                                                                                                   |                                                                                                                             |                                                                                                                     |
|------------|-----------|-----------------------------------------------------------------------------------------------|-------------------------------------------------------------------------------------------------------------------|-----------------------------------------------------------------------------------------------------------------------------|---------------------------------------------------------------------------------------------------------------------|
| <b>D-2</b> | <b>8</b>  | When a mistake is made, but has no potential to harm the patient, how often is this reported? | Cuando se comete un error, pero no tiene el potencial de dañar al paciente, ¿qué tan frecuentemente es reportado? | Se notifican los errores que previsiblemente no van a dañar al paciente.                                                    | Cuando se comete un error, pero no tiene el potencial de dañar al paciente, ¿qué tan frecuentemente es reportado?   |
| <b>D-3</b> | <b>8</b>  | When a mistake is made that could harm the patient, but does not, how often is this reported? | Cuando se comete un error que pudiese dañar al paciente, pero no lo hace, ¿qué tan a menudo es reportado?         | Se notifican los errores que no han tenido consecuencias adversas, aunque previsiblemente podrían haber dañado al paciente. | Cuando se comete un error que pudiese dañar al paciente, pero no lo hace, ¿qué tan a menudo es reportado?           |
| <b>F-1</b> | <b>4</b>  | Management in this facility provides a work climate that promotes patient safety.             | La Dirección de este hospital provee de un ambiente laboral que promueve la seguridad del paciente.               | La gerencia o la dirección del hospital facilita un clima laboral que favorece la seguridad del paciente.                   | La dirección de este hospital/clínica provee de un clima o ambiente laboral que favorece la seguridad del paciente. |
| <b>F-2</b> | <b>9</b>  | Units in this facility do not coordinate well with each other.                                | Las unidades de este hospital no se coordinan bien entre ellas.                                                   | Las diferentes unidades del hospital no se coordinan bien entre ellas.                                                      | Las unidades de este hospital no coordinan bien entre sí.                                                           |
| <b>F-3</b> | <b>11</b> | Things “fall between the cracks” when transferring patients from one unit to another.         | La información de los pacientes se pierde cuando éstos se transfieren de una unidad a otra.                       | La información de los pacientes se pierde, en parte, cuando éstos se transfieren desde una unidad/servicio a otra.          | La información y/o objetos de los pacientes se pierde cuando éstos se transfieren de un servicio/unidad a otra.     |
| <b>F-4</b> | <b>9</b>  | There is good cooperation among units that need to work together.                             | Hay buena cooperación entre las unidades del hospital que necesitan trabajar juntas.                              | Hay una buena cooperación entre las unidades/servicios que tienen que trabajar conjuntamente.                               | Hay buena cooperación entre las unidades del hospital/clínica que necesitan trabajar juntas.                        |
| <b>F-5</b> | <b>11</b> | Important patient care information is often lost during shift changes.                        | Se pierde a menudo información importante de cuidado de pacientes durante cambios de turno.                       | En los cambios de turno se pierde con frecuencia información importante sobre la atención que ha recibido el paciente.      | Se pierde a menudo información importante de cuidado de pacientes durante cambios de turno.                         |
| <b>F-6</b> | <b>9</b>  | It is often unpleasant to work with staff from other units in this facility.                  | Frecuentemente es desagradable trabajar con personal de otras unidades en este hospital.                          | Suele resultar incómodo tener que trabajar con personal de otros servicios/unidades.                                        | Frecuentemente es desagradable trabajar con personal de otras unidades en este hospital/clínica.                    |
| <b>F-7</b> | <b>11</b> | Problems often occur in the exchange of information across units in this facility.            | A menudo surgen problemas en el intercambio de información a través de unidades de este hospital.                 | El intercambio de información entre los diferentes servicios es habitualmente problemático.                                 | A menudo surgen problemas en el intercambio de información a través de las unidades en este hospital/clínica.       |

|             |           |                                                                                                     |                                                                                                                           |                                                                                                                                                     |                                                                                                                                |
|-------------|-----------|-----------------------------------------------------------------------------------------------------|---------------------------------------------------------------------------------------------------------------------------|-----------------------------------------------------------------------------------------------------------------------------------------------------|--------------------------------------------------------------------------------------------------------------------------------|
| <b>F-8</b>  | <b>4</b>  | The actions of management in this facility show that patient safety is a top priority.              | Las acciones de la dirección de este hospital muestra que la seguridad del paciente es altamente prioritaria.             | La gerencia o dirección del hospital muestra con hechos que la seguridad del paciente es una de sus prioridades.                                    | Las acciones de la dirección de este hospital/clínica muestra que la seguridad del paciente es altamente prioritaria.          |
| <b>F-9</b>  | <b>4</b>  | Management in this facility seems interested in patient safety only after an adverse event happens. | La Dirección del hospital parece interesada en la seguridad del paciente sólo después de que ocurre un incidente adverso. | La gerencia/dirección del hospital sólo parece interesarse por la seguridad del paciente cuando ya ha ocurrido algún suceso adverso en un paciente. | La dirección del hospital/clínica parece interesada en la seguridad del paciente sólo después de que ocurre un evento adverso. |
| <b>F-10</b> | <b>9</b>  | Units in this facility work well together to provide the best care for patients.                    | Las unidades del hospital trabajan bien juntas para proveer el mejor cuidado para los pacientes.                          | Los servicios/unidades trabajan de forma coordinada entre sí para proporcionar la mejor atención posible.                                           | Los servicios/unidades en este hospital/clínica trabajan bien unidos para proveer el mejor cuidado a los pacientes.            |
| <b>F-11</b> | <b>11</b> | Shift changes are problematic for patients in this facility.                                        | Los cambios de turnos son problemáticos para los pacientes en este hospital.                                              | Surgen problemas en la atención de los pacientes como consecuencia de los cambios de turno.                                                         | Los cambios de turnos generan problemas para los pacientes en este hospital/clínica.                                           |

#### **AHRQ Hospital Survey on Patient Safety Culture Dimensions**

1. Teamwork within units; 2. Supervisor expectations and actions to promote patient safety; 3. Organizational learning: continuous improvement; 4. Management support for patient safety; 5. Overall perceptions of patient safety; 6. Feedback and communication about error; 7. Communication openness; 8. Frequency of events reported; 9. Teamwork across units; 10. Staffing; 11. Handoffs and transitions; and 12. Nonpunitive response to error.

#### **References links to access the instruments described in this supplemental table:**

1. AHRQ Hospital Survey on Patient Safety Culture: English Version 1.0. Available at: <https://www.ahrq.gov/sites/default/files/wysiwyg/sops/quality-patient-safety/patientsafetyculture/hospitalscanform.pdf>
2. AHRQ Hospital Survey on Patient Safety Culture: Spanish Version 1.0. Available at: [https://www.ahrq.gov/sites/default/files/wysiwyg/sops/surveys/hospital/hospital\\_survey-spanish.pdf](https://www.ahrq.gov/sites/default/files/wysiwyg/sops/surveys/hospital/hospital_survey-spanish.pdf)
3. Cuestionario sobre seguridad de los pacientes: Versión española del Hospital Survey on Patient Safety. Available at: <https://www.mscbs.gob.es/organizacion/sns/planCalidadSNS/docs/CuestionarioSeguridadPacientes1.pdf>
4. Hospital survey on patient safety culture – Peru Version (HSOPSC-PE). Available at: <https://doi.org/10.1186/s12912-020-00419-9>

#### **Hospital Survey on Patient Safety Culture, Agency for Healthcare Research and Quality (AHRQ):**

- Surveys on Patient Safety Culture. Available at: <https://www.ahrq.gov/sops/index.html>
